# Supplementary material
Source: Research Square preprint supplement (doi:10.21203/rs.3.rs-9742442/v1)
Supplement: Supplementary file 1 [file c9f6b4a45b4f721c675acce6.docx]

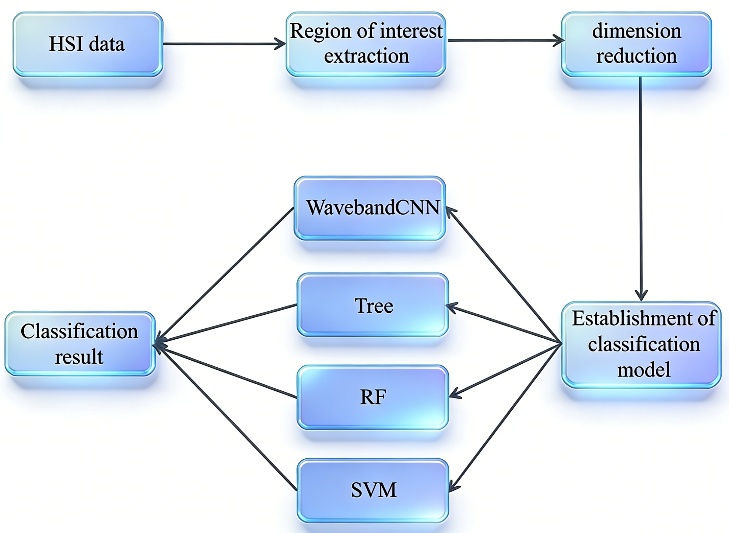


Fig.1 Flowchart of potatoes defect detection using hyperspectral images.


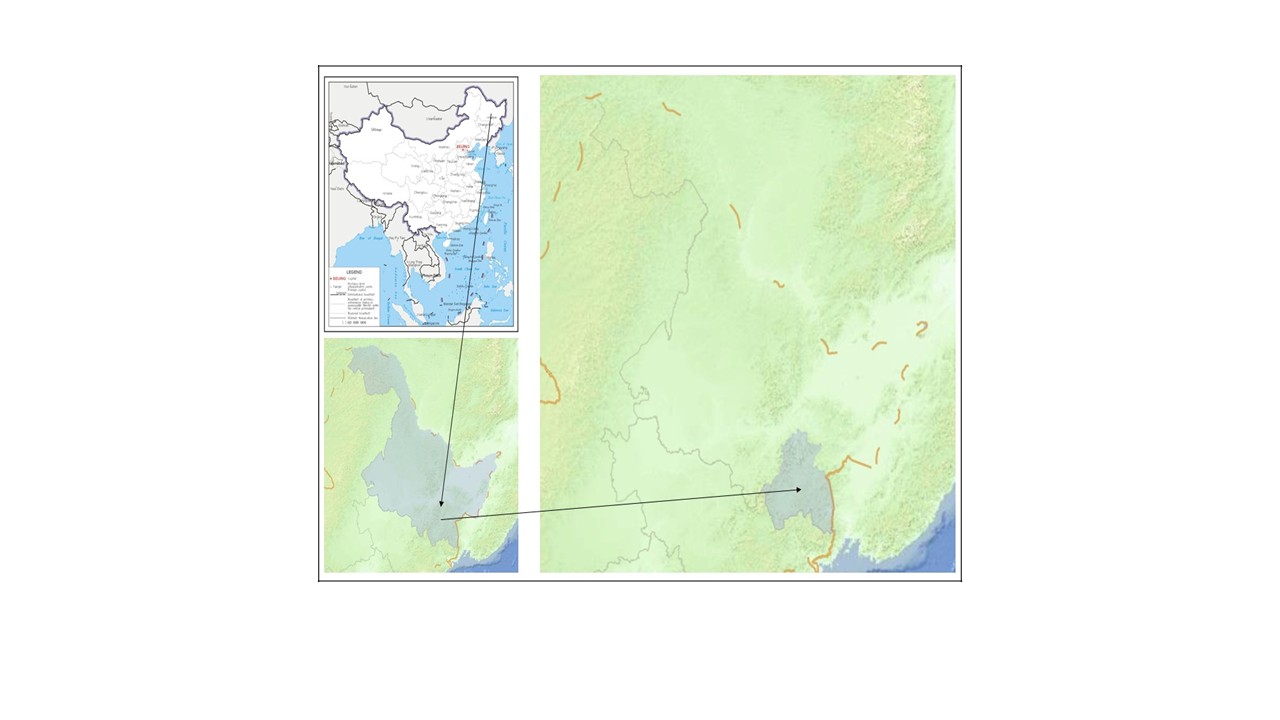


Fig.2. Geographical map of potato harvesting area


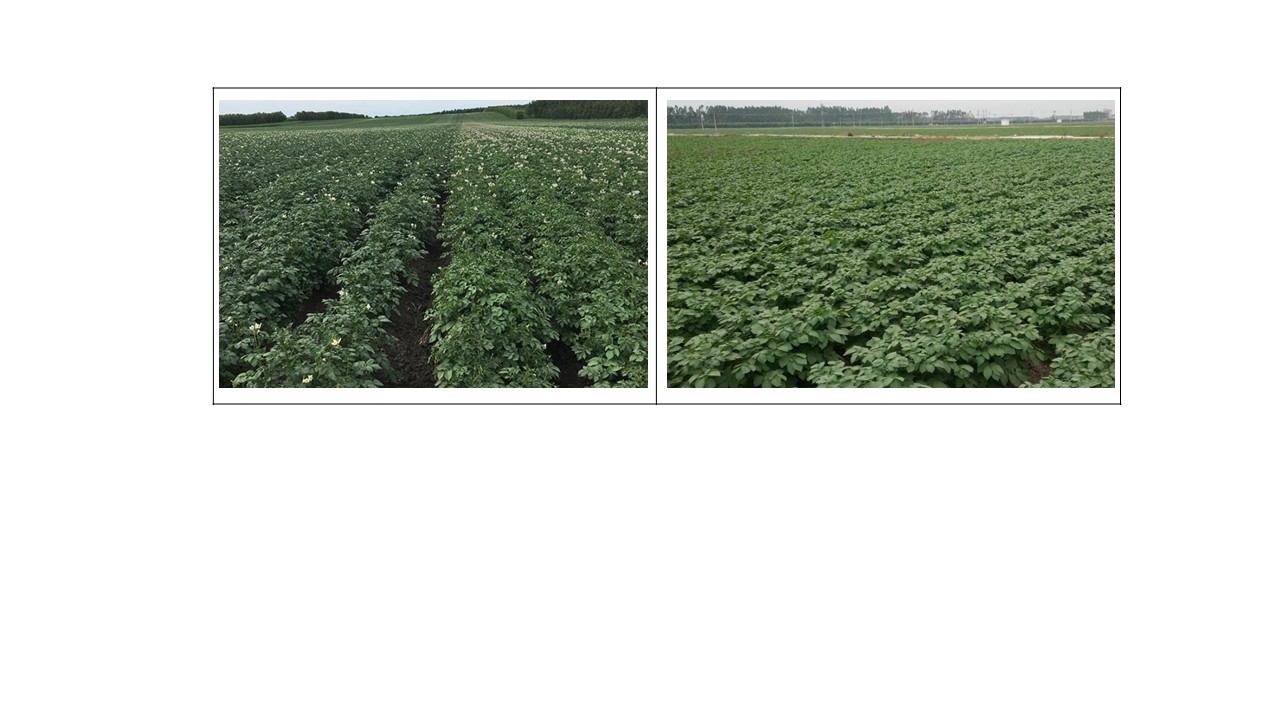


Fig.3. Potato planting base


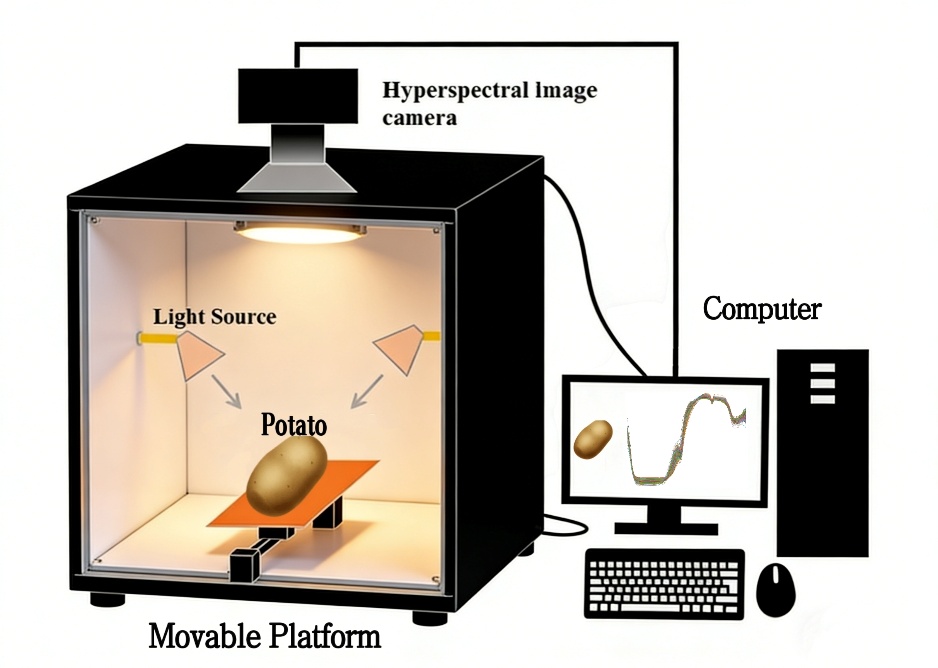


Fig.4. Schematic diagram of hyperspectral imaging system


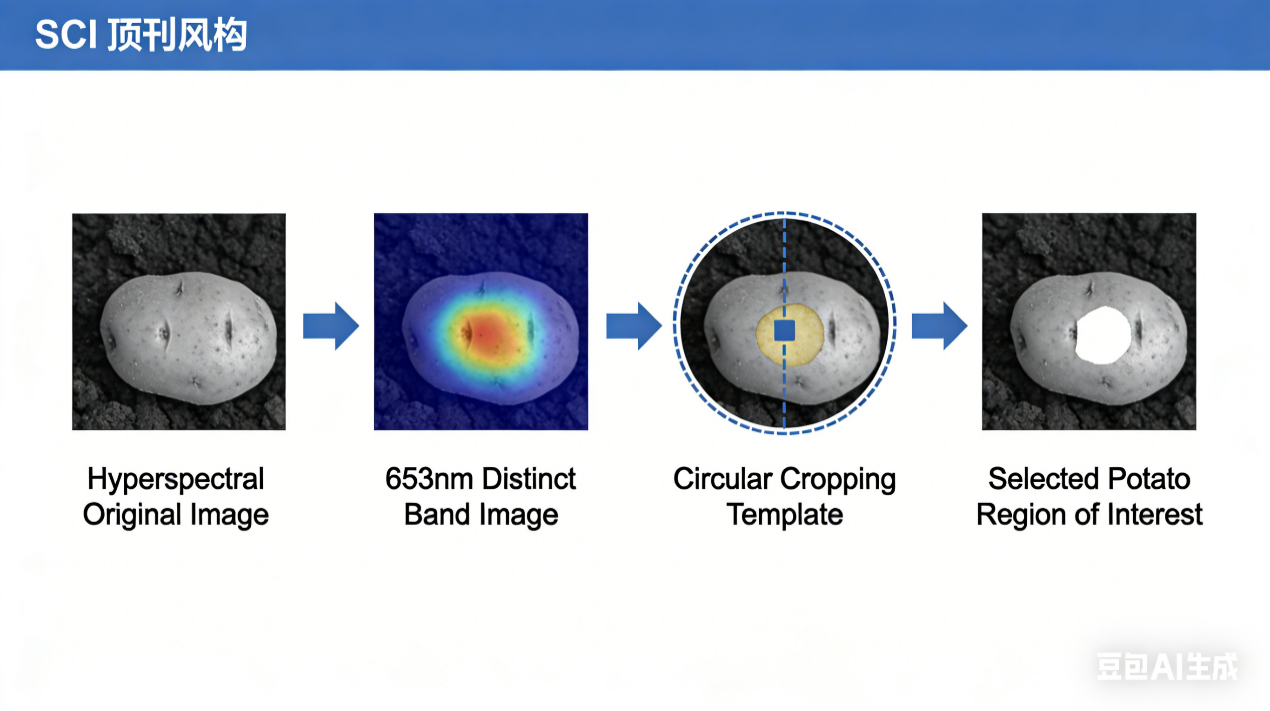


Fig.5. Region of interest extraction process


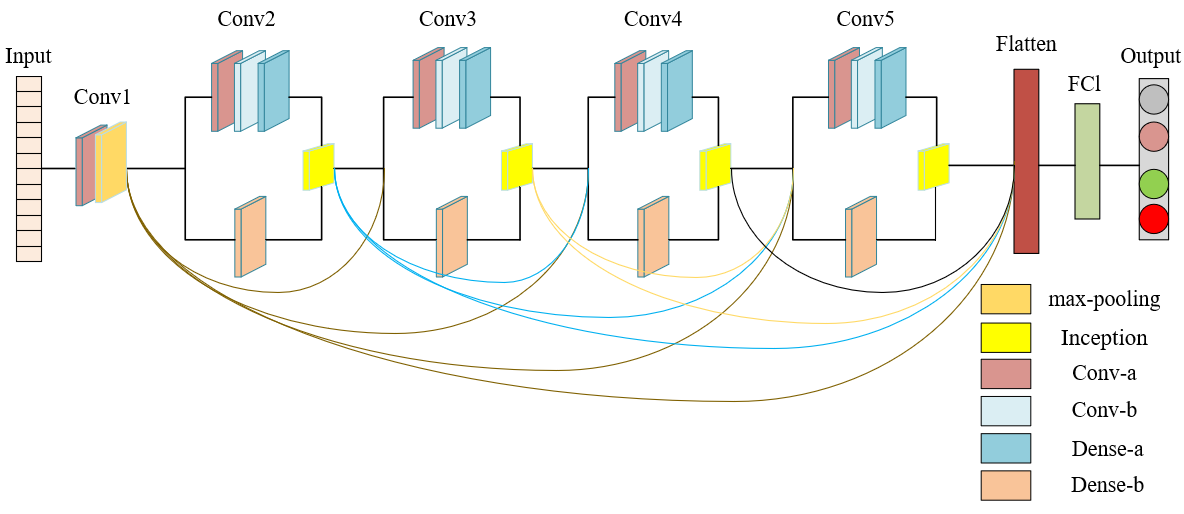
Fig. 6. WavebandCNN model structure diagram.


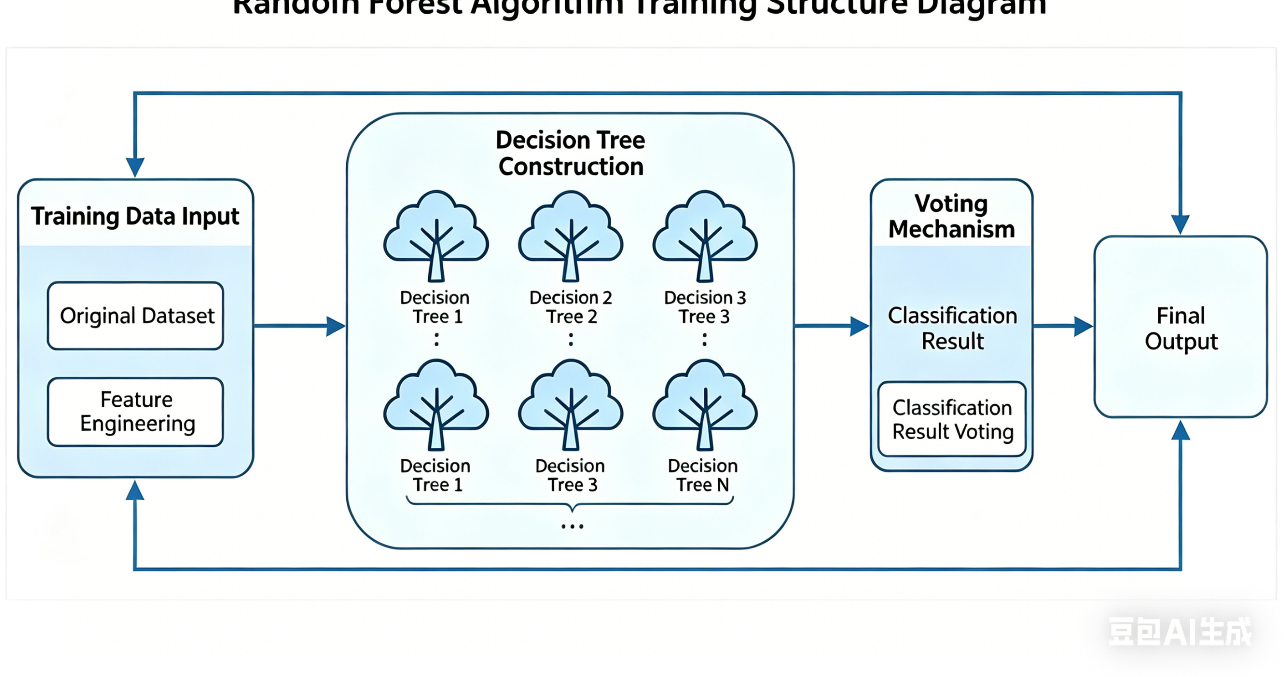


Fig. 7. Random forest algorithm training structure


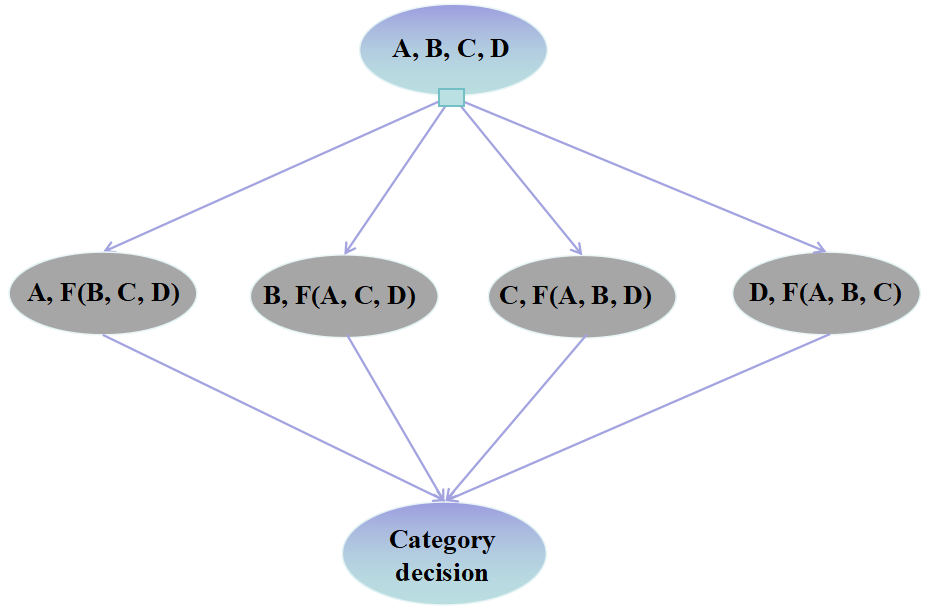


Fig. 8. Multi-categorical SVM classification model


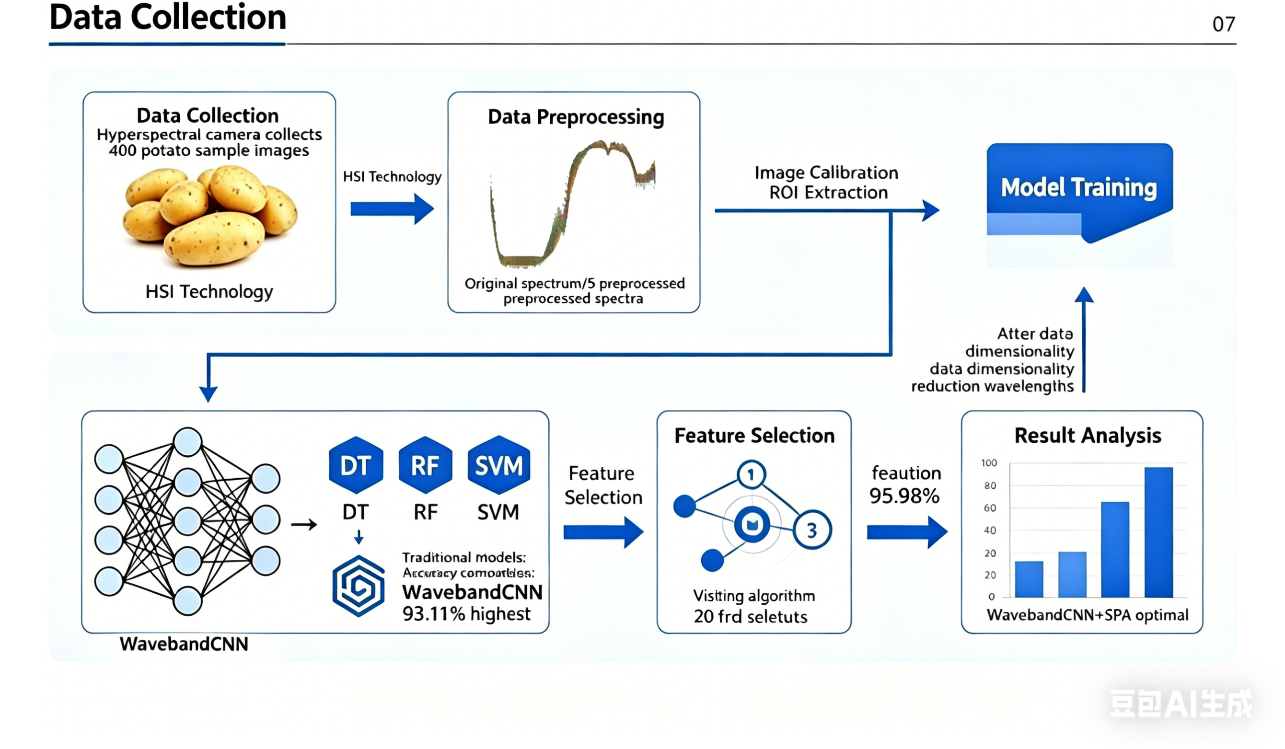


Fig. 9. Research implementation process


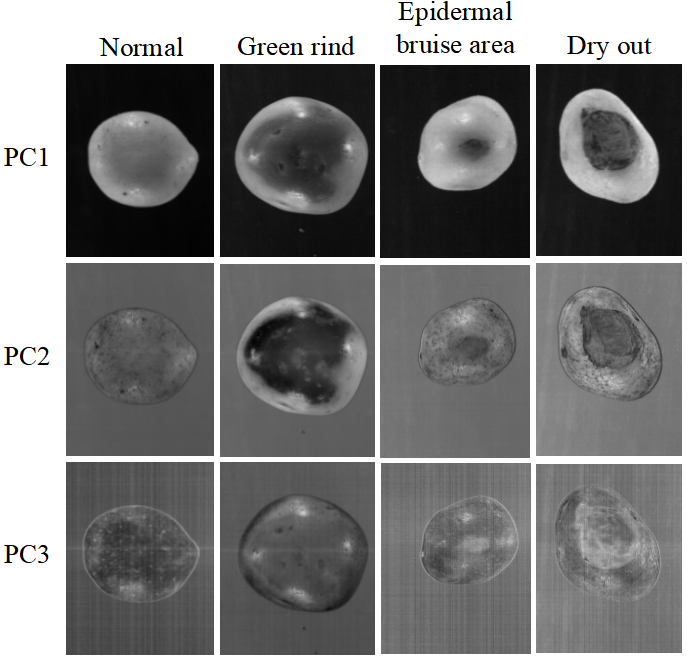


Fig. 10. The first three principal component images of the four samples


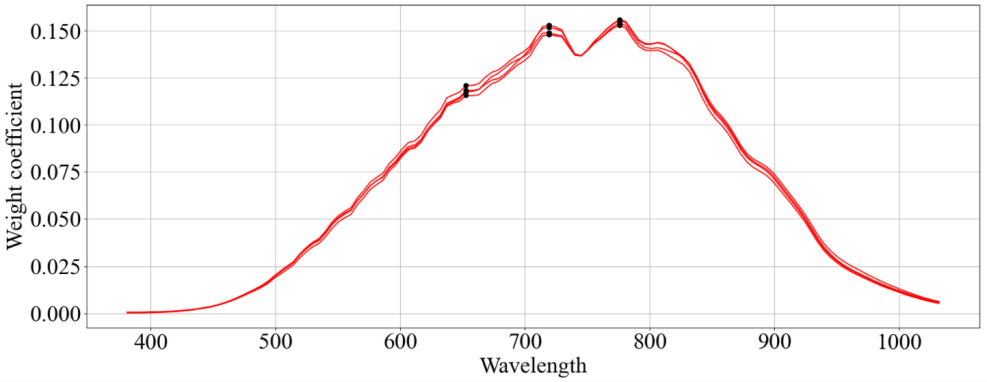


Fig. 11. Map of PC1 weighting factors.


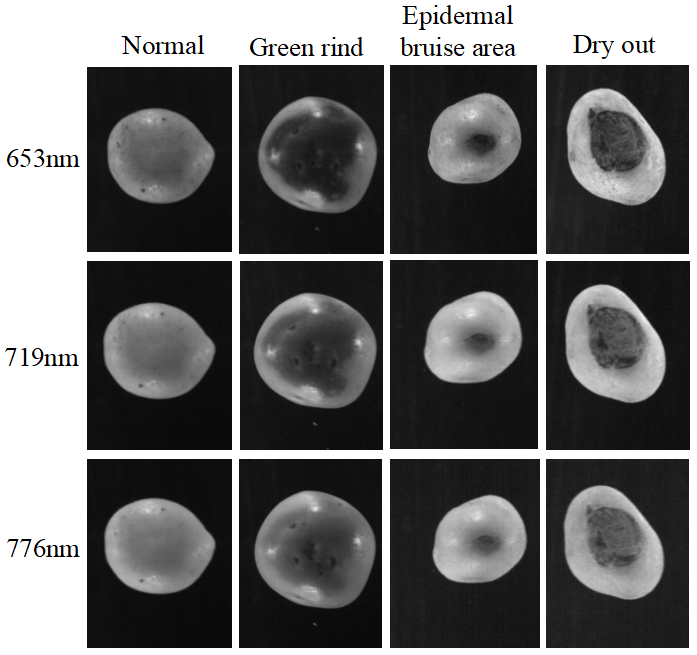


Fig. 12. Images of wavelengths corresponding to the extreme values of the weighting coefficients of PC1


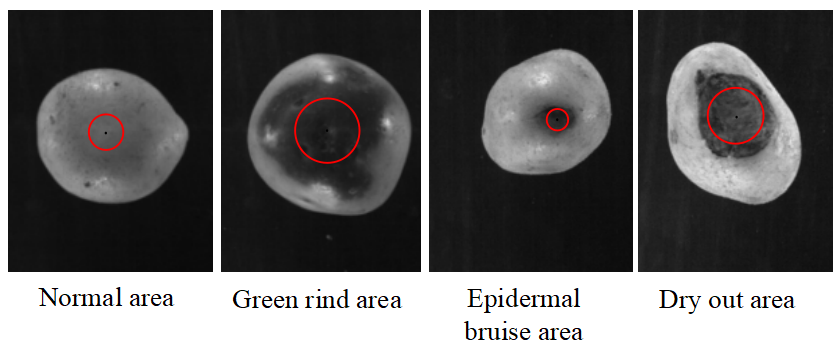


Fig. 13. Extraction of regions of interest


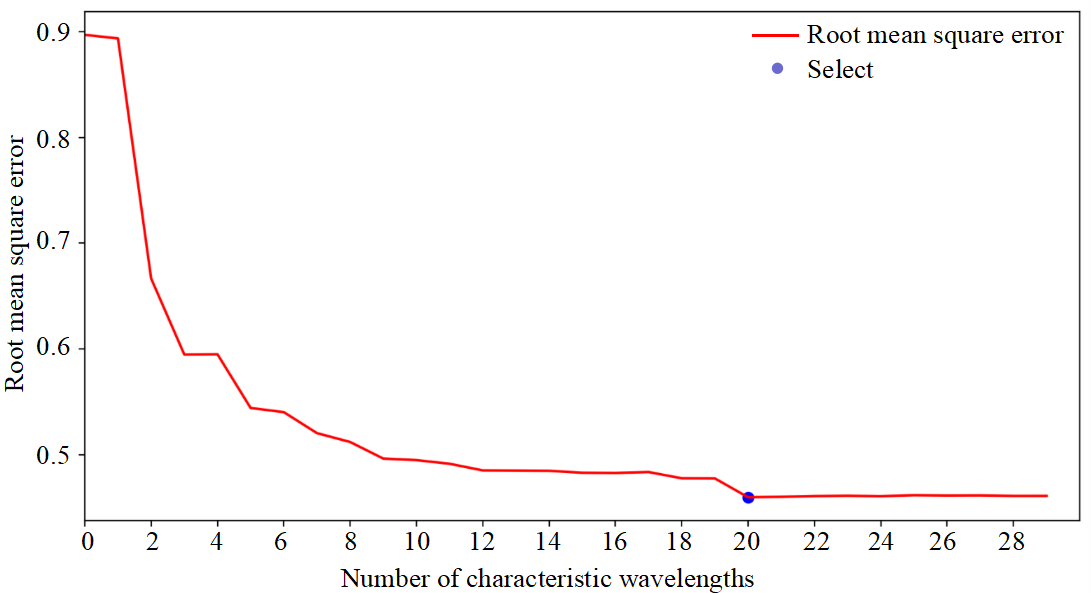


Fig. 14. Relationship between the number of characteristic wavelengths and RMSE.


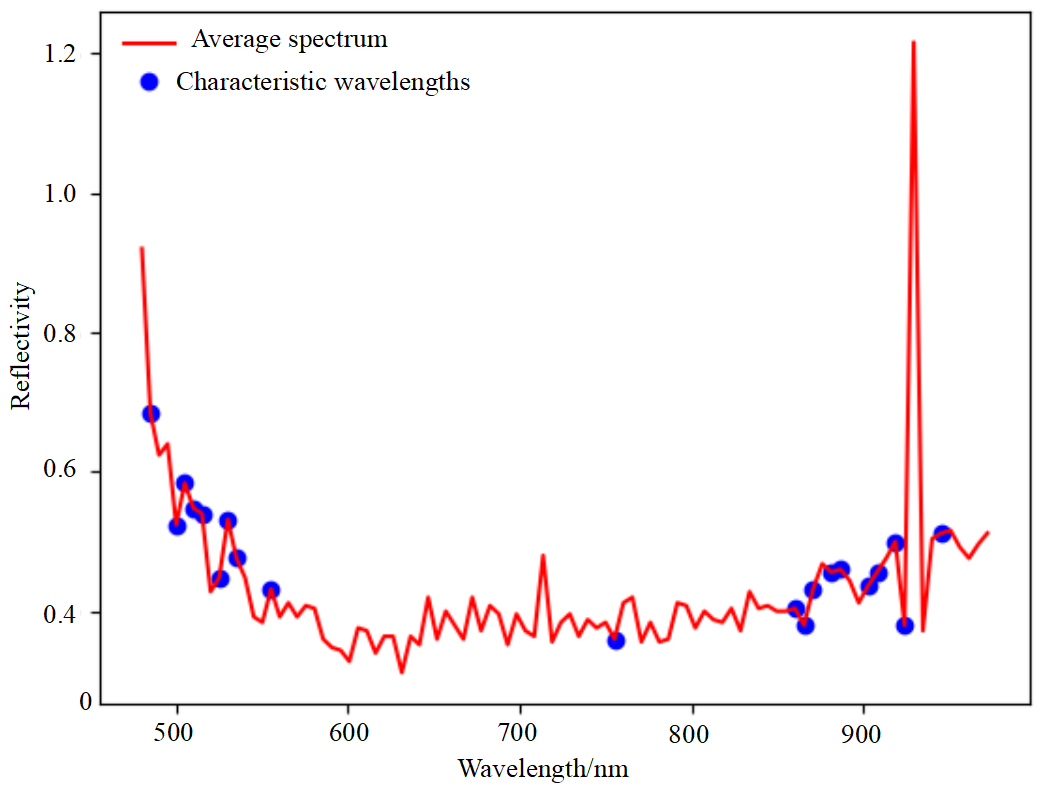


Fig. 15. Distribution map of characteristic wavelength points selected by SPA
